# Supplementary material for: Combining independent decisions increases diagnostic accuracy of reading lumbosacral radiographs and magnetic resonance imaging
Source: PLoS One. 2018 Apr 3;13(4):e0194128. doi: 10.1371/journal.pone.0194128 (PMC5882099; doi:10.1371/journal.pone.0194128)
Supplement: S1 File — The two data sets used in this study. (XLSX) [file pone.0194128.s003.xlsx]

## Sheet: Study 1
Image	Rater	Rating(0=normal,1=abnormality)	Correct_Diagnosis(0=normal,1=abnormality)
1	1	0	0
2	1	1	0
3	1	0	0
4	1	0	0
5	1	0	0
6	1	1	0
7	1	0	0
8	1	1	0
9	1	0	0
10	1	1	1
11	1	1	0
12	1	0	0
13	1	0	0
14	1	1	0
15	1	0	0
16	1	1	1
17	1	1	1
18	1	0	0
19	1	1	0
20	1	0	0
21	1	1	1
22	1	0	0
23	1	0	0
24	1	0	0
25	1	0	0
26	1	1	0
27	1	0	0
28	1	0	0
29	1	1	1
30	1	1	0
31	1	0	0
32	1	0	0
33	1	0	0
34	1	0	0
35	1	0	0
36	1	0	0
37	1	0	0
38	1	1	0
39	1	0	0
40	1	1	1
41	1	0	0
42	1	0	0
43	1	0	0
44	1	0	0
45	1	1	1
46	1	1	1
47	1	0	0
48	1	0	0
49	1	1	1
50	1	0	0
51	1	0	0
52	1	1	1
53	1	0	0
54	1	0	0
55	1	0	0
56	1	0	0
57	1	0	0
58	1	0	0
59	1	0	0
60	1	0	0
61	1	0	0
62	1	0	0
63	1	0	0
64	1	0	1
65	1	1	0
66	1	0	0
67	1	0	0
68	1	0	0
69	1	0	0
70	1	1	0
71	1	0	0
72	1	0	0
73	1	0	0
74	1	0	0
75	1	0	0
76	1	0	0
77	1	0	0
78	1	1	1
79	1	0	0
80	1	1	0
81	1	0	1
82	1	0	0
83	1	0	0
84	1	0	0
85	1	0	0
86	1	0	0
87	1	0	0
88	1	0	0
89	1	1	0
90	1	0	0
91	1	0	0
92	1	0	0
93	1	0	0
94	1	0	0
95	1	0	0
96	1	0	0
97	1	0	0
98	1	1	1
99	1	0	0
100	1	0	0
101	1	1	1
102	1	0	0
103	1	0	0
104	1	0	0
105	1	1	1
106	1	0	0
107	1	0	1
108	1	1	1
109	1	1	1
110	1	1	1
111	1	1	0
112	1	1	0
113	1	0	0
114	1	0	0
115	1	0	0
116	1	0	0
117	1	0	0
118	1	0	0
119	1	1	0
120	1	1	1
121	1	0	0
122	1	1	0
123	1	1	0
124	1	0	0
125	1	1	1
126	1	1	0
127	1	1	1
128	1	0	0
129	1	0	0
130	1	0	0
131	1	1	0
132	1	0	0
133	1	0	0
134	1	0	0
135	1	0	0
136	1	0	0
137	1	0	0
138	1	1	0
139	1	0	0
140	1	0	0
141	1	0	0
142	1	0	0
143	1	1	1
144	1	0	0
145	1	0	0
146	1	0	0
147	1	0	0
148	1	1	1
149	1	0	0
150	1	1	0
151	1	0	0
152	1	0	1
153	1	1	1
154	1	0	0
155	1	0	0
156	1	0	0
157	1	0	0
158	1	0	0
159	1	0	0
160	1	0	0
161	1	1	1
162	1	0	0
163	1	0	0
164	1	0	0
165	1	1	1
166	1	1	1
167	1	0	0
168	1	0	0
169	1	1	1
170	1	0	0
171	1	1	0
172	1	0	0
173	1	0	0
174	1	0	0
175	1	1	0
176	1	0	0
177	1	0	0
178	1	1	0
179	1	0	0
180	1	0	0
181	1	0	0
182	1	0	0
183	1	0	0
184	1	1	1
185	1	1	1
186	1	1	1
187	1	0	0
188	1	0	0
189	1	0	0
190	1	0	0
191	1	1	0
192	1	0	0
193	1	0	0
194	1	0	0
195	1	0	0
196	1	0	0
197	1	0	0
198	1	0	0
199	1	0	0
200	1	1	0
201	1	0	0
202	1	1	1
203	1	1	0
204	1	1	1
205	1	0	0
206	1	1	0
207	1	1	1
208	1	1	0
209	1	0	0
210	1	1	0
211	1	0	0
212	1	0	0
213	1	0	0
214	1	0	0
215	1	0	0
216	1	0	0
217	1	0	0
218	1	0	0
219	1	0	0
220	1	0	0
221	1	0	0
222	1	0	0
223	1	1	0
224	1	1	1
225	1	0	0
226	1	0	0
227	1	0	0
228	1	0	0
229	1	0	0
230	1	0	0
231	1	0	0
232	1	0	0
233	1	0	0
234	1	0	0
235	1	0	0
236	1	0	0
237	1	1	1
238	1	0	0
239	1	0	0
240	1	0	0
241	1	1	1
242	1	1	1
243	1	1	0
244	1	0	1
245	1	0	0
246	1	1	1
247	1	0	0
248	1	0	0
249	1	0	0
250	1	0	0
251	1	0	0
252	1	0	0
253	1	0	0
254	1	0	0
255	1	1	0
256	1	1	0
257	1	0	0
258	1	0	0
259	1	0	0
260	1	1	0
261	1	0	0
262	1	1	1
263	1	0	0
264	1	1	1
265	1	0	1
266	1	0	0
267	1	0	0
268	1	0	0
269	1	0	0
270	1	1	1
271	1	0	0
272	1	0	0
273	1	0	0
274	1	0	0
275	1	0	0
276	1	0	0
277	1	0	0
278	1	0	0
279	1	0	0
280	1	0	0
281	1	1	1
282	1	0	0
283	1	1	1
284	1	0	0
285	1	0	0
286	1	0	0
287	1	0	0
288	1	0	0
289	1	0	0
290	1	1	1
291	1	0	0
292	1	0	0
293	1	0	0
294	1	0	0
295	1	0	0
296	1	0	0
297	1	0	0
298	1	0	0
299	1	0	0
300	1	1	0
1	2	1	0
2	2	0	0
3	2	0	0
4	2	0	0
5	2	0	0
6	2	0	0
7	2	0	0
8	2	0	0
9	2	0	0
10	2	1	1
11	2	1	0
12	2	0	0
13	2	0	0
14	2	1	0
15	2	0	0
16	2	1	1
17	2	1	1
18	2	1	0
19	2	1	0
20	2	0	0
21	2	1	1
22	2	1	0
23	2	0	0
24	2	1	0
25	2	0	0
26	2	1	0
27	2	0	0
28	2	0	0
29	2	1	1
30	2	1	0
31	2	1	0
32	2	1	0
33	2	0	0
34	2	1	0
35	2	0	0
36	2	0	0
37	2	0	0
38	2	0	0
39	2	0	0
40	2	1	1
41	2	0	0
42	2	1	0
43	2	0	0
44	2	0	0
45	2	1	1
46	2	1	1
47	2	0	0
48	2	1	0
49	2	0	1
50	2	0	0
51	2	0	0
52	2	1	1
53	2	0	0
54	2	0	0
55	2	0	0
56	2	0	0
57	2	0	0
58	2	0	0
59	2	0	0
60	2	0	0
61	2	1	0
62	2	0	0
63	2	0	0
64	2	1	1
65	2	0	0
66	2	0	0
67	2	0	0
68	2	0	0
69	2	0	0
70	2	0	0
71	2	0	0
72	2	0	0
73	2	0	0
74	2	0	0
75	2	0	0
76	2	0	0
77	2	0	0
78	2	1	1
79	2	0	0
80	2	1	0
81	2	1	1
82	2	0	0
83	2	0	0
84	2	0	0
85	2	0	0
86	2	1	0
87	2	1	0
88	2	0	0
89	2	1	0
90	2	0	0
91	2	0	0
92	2	0	0
93	2	1	0
94	2	0	0
95	2	0	0
96	2	0	0
97	2	0	0
98	2	1	1
99	2	0	0
100	2	0	0
101	2	0	1
102	2	0	0
103	2	0	0
104	2	1	0
105	2	1	1
106	2	0	0
107	2	1	1
108	2	1	1
109	2	1	1
110	2	1	1
111	2	0	0
112	2	0	0
113	2	0	0
114	2	0	0
115	2	0	0
116	2	0	0
117	2	0	0
118	2	0	0
119	2	0	0
120	2	1	1
121	2	0	0
122	2	0	0
123	2	1	0
124	2	0	0
125	2	1	1
126	2	0	0
127	2	0	1
128	2	0	0
129	2	0	0
130	2	0	0
131	2	0	0
132	2	0	0
133	2	0	0
134	2	0	0
135	2	1	0
136	2	0	0
137	2	0	0
138	2	0	0
139	2	0	0
140	2	1	0
141	2	0	0
142	2	0	0
143	2	1	1
144	2	0	0
145	2	0	0
146	2	1	0
147	2	0	0
148	2	1	1
149	2	0	0
150	2	1	0
151	2	0	0
152	2	0	1
153	2	1	1
154	2	0	0
155	2	0	0
156	2	0	0
157	2	0	0
158	2	0	0
159	2	1	0
160	2	0	0
161	2	1	1
162	2	0	0
163	2	0	0
164	2	0	0
165	2	1	1
166	2	1	1
167	2	0	0
168	2	0	0
169	2	1	1
170	2	0	0
171	2	0	0
172	2	0	0
173	2	0	0
174	2	0	0
175	2	0	0
176	2	0	0
177	2	0	0
178	2	1	0
179	2	1	0
180	2	0	0
181	2	1	0
182	2	0	0
183	2	0	0
184	2	1	1
185	2	1	1
186	2	1	1
187	2	0	0
188	2	0	0
189	2	0	0
190	2	0	0
191	2	0	0
192	2	1	0
193	2	0	0
194	2	0	0
195	2	0	0
196	2	0	0
197	2	0	0
198	2	0	0
199	2	0	0
200	2	0	0
201	2	0	0
202	2	1	1
203	2	0	0
204	2	1	1
205	2	0	0
206	2	0	0
207	2	1	1
208	2	1	0
209	2	1	0
210	2	0	0
211	2	0	0
212	2	0	0
213	2	0	0
214	2	0	0
215	2	0	0
216	2	0	0
217	2	0	0
218	2	0	0
219	2	0	0
220	2	0	0
221	2	0	0
222	2	0	0
223	2	0	0
224	2	1	1
225	2	0	0
226	2	0	0
227	2	0	0
228	2	0	0
229	2	1	0
230	2	0	0
231	2	0	0
232	2	0	0
233	2	0	0
234	2	0	0
235	2	0	0
236	2	0	0
237	2	1	1
238	2	1	0
239	2	0	0
240	2	0	0
241	2	1	1
242	2	1	1
243	2	1	0
244	2	0	1
245	2	1	0
246	2	1	1
247	2	1	0
248	2	0	0
249	2	0	0
250	2	0	0
251	2	0	0
252	2	0	0
253	2	0	0
254	2	0	0
255	2	1	0
256	2	1	0
257	2	0	0
258	2	0	0
259	2	0	0
260	2	0	0
261	2	1	0
262	2	1	1
263	2	0	0
264	2	1	1
265	2	1	1
266	2	1	0
267	2	0	0
268	2	1	0
269	2	0	0
270	2	1	1
271	2	0	0
272	2	0	0
273	2	0	0
274	2	0	0
275	2	0	0
276	2	0	0
277	2	0	0
278	2	0	0
279	2	0	0
280	2	0	0
281	2	1	1
282	2	1	0
283	2	1	1
284	2	0	0
285	2	0	0
286	2	0	0
287	2	0	0
288	2	1	0
289	2	0	0
290	2	1	1
291	2	0	0
292	2	0	0
293	2	0	0
294	2	0	0
295	2	0	0
296	2	0	0
297	2	1	0
298	2	0	0
299	2	0	0
300	2	0	0
1	3	0	0
2	3	1	0
3	3	1	0
4	3	0	0
5	3	0	0
6	3	1	0
7	3	0	0
8	3	1	0
9	3	0	0
10	3	1	1
11	3	0	0
12	3	1	0
13	3	0	0
14	3	0	0
15	3	0	0
16	3	1	1
17	3	1	1
18	3	0	0
19	3	1	0
20	3	0	0
21	3	1	1
22	3	0	0
23	3	1	0
24	3	1	0
25	3	0	0
26	3	1	0
27	3	0	0
28	3	0	0
29	3	1	1
30	3	0	0
31	3	0	0
32	3	0	0
33	3	1	0
34	3	0	0
35	3	0	0
36	3	0	0
37	3	1	0
38	3	1	0
39	3	0	0
40	3	0	1
41	3	0	0
42	3	0	0
43	3	1	0
44	3	1	0
45	3	1	1
46	3	1	1
47	3	0	0
48	3	0	0
49	3	1	1
50	3	0	0
51	3	0	0
52	3	1	1
53	3	0	0
54	3	0	0
55	3	1	0
56	3	0	0
57	3	0	0
58	3	0	0
59	3	0	0
60	3	0	0
61	3	0	0
62	3	0	0
63	3	0	0
64	3	1	1
65	3	0	0
66	3	0	0
67	3	1	0
68	3	1	0
69	3	0	0
70	3	0	0
71	3	0	0
72	3	1	0
73	3	1	0
74	3	0	0
75	3	1	0
76	3	1	0
77	3	1	0
78	3	1	1
79	3	1	0
80	3	0	0
81	3	1	1
82	3	0	0
83	3	0	0
84	3	1	0
85	3	0	0
86	3	1	0
87	3	1	0
88	3	1	0
89	3	1	0
90	3	0	0
91	3	1	0
92	3	0	0
93	3	1	0
94	3	0	0
95	3	1	0
96	3	1	0
97	3	0	0
98	3	1	1
99	3	0	0
100	3	1	0
101	3	1	1
102	3	0	0
103	3	0	0
104	3	1	0
105	3	1	1
106	3	0	0
107	3	1	1
108	3	1	1
109	3	1	1
110	3	1	1
111	3	1	0
112	3	1	0
113	3	1	0
114	3	0	0
115	3	0	0
116	3	0	0
117	3	0	0
118	3	0	0
119	3	0	0
120	3	1	1
121	3	1	0
122	3	1	0
123	3	1	0
124	3	0	0
125	3	1	1
126	3	0	0
127	3	0	1
128	3	1	0
129	3	1	0
130	3	0	0
131	3	0	0
132	3	0	0
133	3	0	0
134	3	1	0
135	3	1	0
136	3	0	0
137	3	1	0
138	3	0	0
139	3	0	0
140	3	0	0
141	3	1	0
142	3	1	0
143	3	1	1
144	3	0	0
145	3	0	0
146	3	0	0
147	3	0	0
148	3	1	1
149	3	0	0
150	3	1	0
151	3	0	0
152	3	0	1
153	3	1	1
154	3	1	0
155	3	0	0
156	3	0	0
157	3	0	0
158	3	0	0
159	3	0	0
160	3	0	0
161	3	1	1
162	3	0	0
163	3	0	0
164	3	0	0
165	3	1	1
166	3	1	1
167	3	1	0
168	3	0	0
169	3	1	1
170	3	0	0
171	3	0	0
172	3	1	0
173	3	0	0
174	3	0	0
175	3	1	0
176	3	1	0
177	3	0	0
178	3	1	0
179	3	1	0
180	3	0	0
181	3	0	0
182	3	0	0
183	3	1	0
184	3	1	1
185	3	1	1
186	3	1	1
187	3	0	0
188	3	0	0
189	3	0	0
190	3	0	0
191	3	0	0
192	3	1	0
193	3	0	0
194	3	1	0
195	3	0	0
196	3	0	0
197	3	0	0
198	3	0	0
199	3	1	0
200	3	0	0
201	3	0	0
202	3	1	1
203	3	0	0
204	3	1	1
205	3	0	0
206	3	1	0
207	3	1	1
208	3	1	0
209	3	0	0
210	3	1	0
211	3	0	0
212	3	1	0
213	3	0	0
214	3	0	0
215	3	1	0
216	3	0	0
217	3	0	0
218	3	0	0
219	3	1	0
220	3	1	0
221	3	0	0
222	3	0	0
223	3	0	0
224	3	1	1
225	3	0	0
226	3	1	0
227	3	0	0
228	3	0	0
229	3	1	0
230	3	0	0
231	3	0	0
232	3	0	0
233	3	0	0
234	3	0	0
235	3	1	0
236	3	0	0
237	3	1	1
238	3	1	0
239	3	0	0
240	3	1	0
241	3	1	1
242	3	1	1
243	3	1	0
244	3	1	1
245	3	1	0
246	3	1	1
247	3	1	0
248	3	0	0
249	3	1	0
250	3	1	0
251	3	0	0
252	3	1	0
253	3	0	0
254	3	0	0
255	3	1	0
256	3	1	0
257	3	1	0
258	3	1	0
259	3	0	0
260	3	0	0
261	3	0	0
262	3	1	1
263	3	1	0
264	3	1	1
265	3	1	1
266	3	1	0
267	3	0	0
268	3	0	0
269	3	0	0
270	3	1	1
271	3	1	0
272	3	0	0
273	3	1	0
274	3	0	0
275	3	1	0
276	3	0	0
277	3	0	0
278	3	0	0
279	3	0	0
280	3	0	0
281	3	1	1
282	3	1	0
283	3	1	1
284	3	1	0
285	3	0	0
286	3	1	0
287	3	0	0
288	3	0	0
289	3	0	0
290	3	1	1
291	3	0	0
292	3	0	0
293	3	0	0
294	3	1	0
295	3	0	0
296	3	0	0
297	3	1	0
298	3	0	0
299	3	0	0
300	3	0	0
1	4	0	0
2	4	0	0
3	4	1	0
4	4	0	0
5	4	0	0
6	4	0	0
7	4	0	0
8	4	0	0
9	4	0	0
10	4	1	1
11	4	1	0
12	4	0	0
13	4	0	0
14	4	0	0
15	4	0	0
16	4	1	1
17	4	1	1
18	4	0	0
19	4	0	0
20	4	0	0
21	4	1	1
22	4	0	0
23	4	0	0
24	4	0	0
25	4	0	0
26	4	1	0
27	4	0	0
28	4	0	0
29	4	1	1
30	4	0	0
31	4	0	0
32	4	1	0
33	4	1	0
34	4	0	0
35	4	1	0
36	4	0	0
37	4	1	0
38	4	1	0
39	4	0	0
40	4	1	1
41	4	0	0
42	4	0	0
43	4	0	0
44	4	0	0
45	4	1	1
46	4	1	1
47	4	0	0
48	4	0	0
49	4	0	1
50	4	0	0
51	4	1	0
52	4	1	1
53	4	0	0
54	4	0	0
55	4	1	0
56	4	0	0
57	4	0	0
58	4	0	0
59	4	0	0
60	4	0	0
61	4	0	0
62	4	0	0
63	4	0	0
64	4	0	1
65	4	0	0
66	4	0	0
67	4	0	0
68	4	0	0
69	4	0	0
70	4	0	0
71	4	0	0
72	4	1	0
73	4	0	0
74	4	0	0
75	4	0	0
76	4	1	0
77	4	0	0
78	4	1	1
79	4	0	0
80	4	1	0
81	4	1	1
82	4	0	0
83	4	0	0
84	4	0	0
85	4	0	0
86	4	0	0
87	4	0	0
88	4	0	0
89	4	0	0
90	4	0	0
91	4	0	0
92	4	0	0
93	4	0	0
94	4	0	0
95	4	0	0
96	4	0	0
97	4	0	0
98	4	1	1
99	4	0	0
100	4	0	0
101	4	1	1
102	4	0	0
103	4	0	0
104	4	0	0
105	4	1	1
106	4	0	0
107	4	1	1
108	4	1	1
109	4	1	1
110	4	0	1
111	4	0	0
112	4	0	0
113	4	0	0
114	4	0	0
115	4	0	0
116	4	0	0
117	4	0	0
118	4	0	0
119	4	0	0
120	4	1	1
121	4	0	0
122	4	0	0
123	4	0	0
124	4	0	0
125	4	1	1
126	4	0	0
127	4	1	1
128	4	0	0
129	4	0	0
130	4	0	0
131	4	1	0
132	4	0	0
133	4	0	0
134	4	0	0
135	4	0	0
136	4	0	0
137	4	0	0
138	4	0	0
139	4	0	0
140	4	0	0
141	4	1	0
142	4	0	0
143	4	1	1
144	4	0	0
145	4	0	0
146	4	0	0
147	4	0	0
148	4	1	1
149	4	0	0
150	4	1	0
151	4	0	0
152	4	1	1
153	4	1	1
154	4	0	0
155	4	0	0
156	4	0	0
157	4	1	0
158	4	1	0
159	4	1	0
160	4	0	0
161	4	1	1
162	4	0	0
163	4	0	0
164	4	0	0
165	4	1	1
166	4	1	1
167	4	1	0
168	4	0	0
169	4	1	1
170	4	0	0
171	4	0	0
172	4	0	0
173	4	0	0
174	4	0	0
175	4	0	0
176	4	1	0
177	4	0	0
178	4	0	0
179	4	1	0
180	4	0	0
181	4	0	0
182	4	0	0
183	4	0	0
184	4	1	1
185	4	1	1
186	4	1	1
187	4	0	0
188	4	0	0
189	4	0	0
190	4	0	0
191	4	0	0
192	4	1	0
193	4	0	0
194	4	0	0
195	4	0	0
196	4	0	0
197	4	0	0
198	4	0	0
199	4	0	0
200	4	0	0
201	4	0	0
202	4	1	1
203	4	0	0
204	4	1	1
205	4	0	0
206	4	0	0
207	4	1	1
208	4	0	0
209	4	0	0
210	4	0	0
211	4	0	0
212	4	0	0
213	4	0	0
214	4	0	0
215	4	0	0
216	4	0	0
217	4	0	0
218	4	0	0
219	4	0	0
220	4	0	0
221	4	0	0
222	4	0	0
223	4	0	0
224	4	1	1
225	4	0	0
226	4	0	0
227	4	0	0
228	4	0	0
229	4	1	0
230	4	0	0
231	4	0	0
232	4	0	0
233	4	0	0
234	4	0	0
235	4	0	0
236	4	0	0
237	4	1	1
238	4	0	0
239	4	0	0
240	4	0	0
241	4	1	1
242	4	1	1
243	4	0	0
244	4	0	1
245	4	0	0
246	4	0	1
247	4	0	0
248	4	0	0
249	4	0	0
250	4	0	0
251	4	0	0
252	4	0	0
253	4	0	0
254	4	0	0
255	4	0	0
256	4	1	0
257	4	0	0
258	4	0	0
259	4	0	0
260	4	0	0
261	4	0	0
262	4	1	1
263	4	0	0
264	4	1	1
265	4	0	1
266	4	0	0
267	4	0	0
268	4	0	0
269	4	0	0
270	4	1	1
271	4	0	0
272	4	0	0
273	4	0	0
274	4	0	0
275	4	0	0
276	4	0	0
277	4	0	0
278	4	0	0
279	4	0	0
280	4	1	0
281	4	1	1
282	4	0	0
283	4	1	1
284	4	0	0
285	4	0	0
286	4	0	0
287	4	0	0
288	4	0	0
289	4	0	0
290	4	1	1
291	4	1	0
292	4	0	0
293	4	0	0
294	4	0	0
295	4	0	0
296	4	0	0
297	4	0	0
298	4	0	0
299	4	0	0
300	4	0	0
1	5	0	0
2	5	1	0
3	5	1	0
4	5	0	0
5	5	0	0
6	5	0	0
7	5	0	0
8	5	1	0
9	5	0	0
10	5	1	1
11	5	0	0
12	5	0	0
13	5	0	0
14	5	0	0
15	5	0	0
16	5	1	1
17	5	1	1
18	5	0	0
19	5	0	0
20	5	0	0
21	5	1	1
22	5	1	0
23	5	0	0
24	5	0	0
25	5	0	0
26	5	0	0
27	5	0	0
28	5	0	0
29	5	0	1
30	5	1	0
31	5	0	0
32	5	0	0
33	5	0	0
34	5	0	0
35	5	0	0
36	5	0	0
37	5	0	0
38	5	0	0
39	5	1	0
40	5	0	1
41	5	0	0
42	5	0	0
43	5	0	0
44	5	0	0
45	5	1	1
46	5	1	1
47	5	0	0
48	5	0	0
49	5	0	1
50	5	0	0
51	5	0	0
52	5	1	1
53	5	1	0
54	5	0	0
55	5	1	0
56	5	0	0
57	5	0	0
58	5	0	0
59	5	0	0
60	5	0	0
61	5	0	0
62	5	0	0
63	5	0	0
64	5	1	1
65	5	0	0
66	5	0	0
67	5	1	0
68	5	0	0
69	5	0	0
70	5	0	0
71	5	0	0
72	5	0	0
73	5	0	0
74	5	0	0
75	5	1	0
76	5	0	0
77	5	0	0
78	5	1	1
79	5	0	0
80	5	1	0
81	5	1	1
82	5	1	0
83	5	0	0
84	5	0	0
85	5	0	0
86	5	0	0
87	5	0	0
88	5	0	0
89	5	1	0
90	5	0	0
91	5	0	0
92	5	0	0
93	5	1	0
94	5	0	0
95	5	0	0
96	5	1	0
97	5	0	0
98	5	1	1
99	5	0	0
100	5	1	0
101	5	1	1
102	5	0	0
103	5	0	0
104	5	0	0
105	5	1	1
106	5	0	0
107	5	0	1
108	5	1	1
109	5	1	1
110	5	1	1
111	5	1	0
112	5	1	0
113	5	0	0
114	5	0	0
115	5	0	0
116	5	0	0
117	5	0	0
118	5	1	0
119	5	0	0
120	5	1	1
121	5	0	0
122	5	0	0
123	5	0	0
124	5	0	0
125	5	1	1
126	5	0	0
127	5	0	1
128	5	0	0
129	5	0	0
130	5	0	0
131	5	0	0
132	5	1	0
133	5	0	0
134	5	0	0
135	5	0	0
136	5	0	0
137	5	0	0
138	5	1	0
139	5	0	0
140	5	1	0
141	5	1	0
142	5	0	0
143	5	1	1
144	5	0	0
145	5	0	0
146	5	0	0
147	5	1	0
148	5	1	1
149	5	0	0
150	5	1	0
151	5	0	0
152	5	0	1
153	5	1	1
154	5	0	0
155	5	0	0
156	5	0	0
157	5	0	0
158	5	0	0
159	5	1	0
160	5	1	0
161	5	1	1
162	5	0	0
163	5	0	0
164	5	0	0
165	5	1	1
166	5	1	1
167	5	0	0
168	5	1	0
169	5	1	1
170	5	0	0
171	5	0	0
172	5	0	0
173	5	0	0
174	5	0	0
175	5	0	0
176	5	1	0
177	5	0	0
178	5	1	0
179	5	0	0
180	5	0	0
181	5	1	0
182	5	0	0
183	5	0	0
184	5	1	1
185	5	1	1
186	5	1	1
187	5	0	0
188	5	0	0
189	5	0	0
190	5	0	0
191	5	0	0
192	5	0	0
193	5	0	0
194	5	0	0
195	5	0	0
196	5	0	0
197	5	0	0
198	5	0	0
199	5	0	0
200	5	0	0
201	5	0	0
202	5	1	1
203	5	0	0
204	5	1	1
205	5	0	0
206	5	0	0
207	5	1	1
208	5	0	0
209	5	0	0
210	5	0	0
211	5	0	0
212	5	0	0
213	5	0	0
214	5	0	0
215	5	1	0
216	5	0	0
217	5	0	0
218	5	0	0
219	5	0	0
220	5	0	0
221	5	0	0
222	5	0	0
223	5	0	0
224	5	1	1
225	5	0	0
226	5	0	0
227	5	0	0
228	5	0	0
229	5	0	0
230	5	0	0
231	5	0	0
232	5	0	0
233	5	0	0
234	5	0	0
235	5	0	0
236	5	0	0
237	5	1	1
238	5	0	0
239	5	0	0
240	5	0	0
241	5	1	1
242	5	1	1
243	5	1	0
244	5	1	1
245	5	0	0
246	5	1	1
247	5	0	0
248	5	0	0
249	5	0	0
250	5	0	0
251	5	0	0
252	5	0	0
253	5	0	0
254	5	0	0
255	5	1	0
256	5	1	0
257	5	0	0
258	5	1	0
259	5	0	0
260	5	0	0
261	5	0	0
262	5	1	1
263	5	0	0
264	5	1	1
265	5	1	1
266	5	0	0
267	5	0	0
268	5	0	0
269	5	0	0
270	5	1	1
271	5	0	0
272	5	0	0
273	5	0	0
274	5	0	0
275	5	0	0
276	5	0	0
277	5	0	0
278	5	0	0
279	5	0	0
280	5	0	0
281	5	1	1
282	5	1	0
283	5	1	1
284	5	0	0
285	5	0	0
286	5	0	0
287	5	0	0
288	5	0	0
289	5	0	0
290	5	1	1
291	5	1	0
292	5	0	0
293	5	0	0
294	5	0	0
295	5	0	0
296	5	0	0
297	5	0	0
298	5	0	0
299	5	0	0
300	5	0	0
1	6	0	0
2	6	1	0
3	6	1	0
4	6	0	0
5	6	0	0
6	6	0	0
7	6	0	0
8	6	1	0
9	6	0	0
10	6	1	1
11	6	0	0
12	6	0	0
13	6	1	0
14	6	1	0
15	6	1	0
16	6	1	1
17	6	1	1
18	6	0	0
19	6	1	0
20	6	1	0
21	6	1	1
22	6	1	0
23	6	1	0
24	6	0	0
25	6	0	0
26	6	0	0
27	6	1	0
28	6	0	0
29	6	0	1
30	6	1	0
31	6	1	0
32	6	0	0
33	6	0	0
34	6	0	0
35	6	1	0
36	6	0	0
37	6	1	0
38	6	1	0
39	6	0	0
40	6	1	1
41	6	1	0
42	6	1	0
43	6	0	0
44	6	0	0
45	6	1	1
46	6	1	1
47	6	0	0
48	6	0	0
49	6	1	1
50	6	0	0
51	6	0	0
52	6	1	1
53	6	0	0
54	6	0	0
55	6	1	0
56	6	0	0
57	6	0	0
58	6	0	0
59	6	1	0
60	6	0	0
61	6	0	0
62	6	0	0
63	6	1	0
64	6	1	1
65	6	0	0
66	6	0	0
67	6	0	0
68	6	1	0
69	6	0	0
70	6	1	0
71	6	0	0
72	6	0	0
73	6	0	0
74	6	0	0
75	6	0	0
76	6	0	0
77	6	0	0
78	6	1	1
79	6	1	0
80	6	0	0
81	6	0	1
82	6	1	0
83	6	0	0
84	6	0	0
85	6	0	0
86	6	0	0
87	6	0	0
88	6	0	0
89	6	1	0
90	6	0	0
91	6	0	0
92	6	0	0
93	6	1	0
94	6	0	0
95	6	0	0
96	6	0	0
97	6	0	0
98	6	1	1
99	6	0	0
100	6	0	0
101	6	1	1
102	6	0	0
103	6	0	0
104	6	0	0
105	6	1	1
106	6	0	0
107	6	1	1
108	6	1	1
109	6	1	1
110	6	1	1
111	6	1	0
112	6	1	0
113	6	1	0
114	6	1	0
115	6	0	0
116	6	0	0
117	6	0	0
118	6	1	0
119	6	0	0
120	6	1	1
121	6	1	0
122	6	1	0
123	6	1	0
124	6	0	0
125	6	1	1
126	6	0	0
127	6	1	1
128	6	0	0
129	6	0	0
130	6	0	0
131	6	0	0
132	6	0	0
133	6	0	0
134	6	0	0
135	6	1	0
136	6	0	0
137	6	1	0
138	6	1	0
139	6	0	0
140	6	1	0
141	6	0	0
142	6	0	0
143	6	1	1
144	6	0	0
145	6	1	0
146	6	1	0
147	6	0	0
148	6	0	1
149	6	0	0
150	6	0	0
151	6	0	0
152	6	1	1
153	6	1	1
154	6	0	0
155	6	0	0
156	6	0	0
157	6	0	0
158	6	0	0
159	6	0	0
160	6	0	0
161	6	1	1
162	6	0	0
163	6	1	0
164	6	0	0
165	6	1	1
166	6	1	1
167	6	1	0
168	6	0	0
169	6	1	1
170	6	0	0
171	6	0	0
172	6	0	0
173	6	0	0
174	6	0	0
175	6	0	0
176	6	0	0
177	6	0	0
178	6	1	0
179	6	0	0
180	6	0	0
181	6	0	0
182	6	0	0
183	6	0	0
184	6	1	1
185	6	1	1
186	6	1	1
187	6	0	0
188	6	0	0
189	6	0	0
190	6	0	0
191	6	0	0
192	6	0	0
193	6	0	0
194	6	0	0
195	6	0	0
196	6	0	0
197	6	0	0
198	6	0	0
199	6	0	0
200	6	0	0
201	6	0	0
202	6	1	1
203	6	0	0
204	6	1	1
205	6	1	0
206	6	0	0
207	6	1	1
208	6	0	0
209	6	0	0
210	6	1	0
211	6	0	0
212	6	0	0
213	6	0	0
214	6	0	0
215	6	0	0
216	6	0	0
217	6	0	0
218	6	0	0
219	6	0	0
220	6	0	0
221	6	0	0
222	6	0	0
223	6	0	0
224	6	1	1
225	6	0	0
226	6	0	0
227	6	0	0
228	6	0	0
229	6	0	0
230	6	0	0
231	6	1	0
232	6	0	0
233	6	0	0
234	6	0	0
235	6	0	0
236	6	0	0
237	6	0	1
238	6	0	0
239	6	0	0
240	6	0	0
241	6	1	1
242	6	1	1
243	6	0	0
244	6	1	1
245	6	0	0
246	6	1	1
247	6	0	0
248	6	0	0
249	6	0	0
250	6	0	0
251	6	1	0
252	6	0	0
253	6	0	0
254	6	0	0
255	6	0	0
256	6	1	0
257	6	0	0
258	6	1	0
259	6	0	0
260	6	0	0
261	6	0	0
262	6	1	1
263	6	0	0
264	6	1	1
265	6	1	1
266	6	0	0
267	6	0	0
268	6	0	0
269	6	0	0
270	6	1	1
271	6	0	0
272	6	0	0
273	6	0	0
274	6	0	0
275	6	0	0
276	6	0	0
277	6	0	0
278	6	0	0
279	6	0	0
280	6	0	0
281	6	1	1
282	6	1	0
283	6	1	1
284	6	1	0
285	6	0	0
286	6	1	0
287	6	0	0
288	6	0	0
289	6	0	0
290	6	1	1
291	6	0	0
292	6	0	0
293	6	0	0
294	6	0	0
295	6	0	0
296	6	0	0
297	6	0	0
298	6	0	0
299	6	0	0
300	6	0	0
1	7	1	0
2	7	0	0
3	7	0	0
4	7	0	0
5	7	0	0
6	7	0	0
7	7	0	0
8	7	1	0
9	7	0	0
10	7	1	1
11	7	0	0
12	7	0	0
13	7	0	0
14	7	1	0
15	7	0	0
16	7	1	1
17	7	1	1
18	7	0	0
19	7	0	0
20	7	0	0
21	7	1	1
22	7	0	0
23	7	0	0
24	7	0	0
25	7	0	0
26	7	1	0
27	7	0	0
28	7	0	0
29	7	1	1
30	7	0	0
31	7	0	0
32	7	1	0
33	7	0	0
34	7	0	0
35	7	1	0
36	7	0	0
37	7	0	0
38	7	0	0
39	7	0	0
40	7	0	1
41	7	0	0
42	7	0	0
43	7	0	0
44	7	0	0
45	7	1	1
46	7	1	1
47	7	0	0
48	7	0	0
49	7	0	1
50	7	0	0
51	7	0	0
52	7	1	1
53	7	0	0
54	7	0	0
55	7	0	0
56	7	0	0
57	7	0	0
58	7	0	0
59	7	0	0
60	7	0	0
61	7	1	0
62	7	0	0
63	7	1	0
64	7	1	1
65	7	0	0
66	7	0	0
67	7	0	0
68	7	0	0
69	7	0	0
70	7	0	0
71	7	0	0
72	7	1	0
73	7	0	0
74	7	0	0
75	7	0	0
76	7	1	0
77	7	0	0
78	7	1	1
79	7	0	0
80	7	0	0
81	7	0	1
82	7	0	0
83	7	0	0
84	7	0	0
85	7	0	0
86	7	1	0
87	7	0	0
88	7	0	0
89	7	1	0
90	7	0	0
91	7	0	0
92	7	0	0
93	7	0	0
94	7	0	0
95	7	1	0
96	7	1	0
97	7	0	0
98	7	1	1
99	7	0	0
100	7	0	0
101	7	1	1
102	7	0	0
103	7	0	0
104	7	1	0
105	7	1	1
106	7	0	0
107	7	1	1
108	7	1	1
109	7	1	1
110	7	1	1
111	7	0	0
112	7	1	0
113	7	0	0
114	7	1	0
115	7	0	0
116	7	0	0
117	7	0	0
118	7	0	0
119	7	0	0
120	7	1	1
121	7	0	0
122	7	0	0
123	7	1	0
124	7	0	0
125	7	1	1
126	7	1	0
127	7	1	1
128	7	0	0
129	7	1	0
130	7	0	0
131	7	0	0
132	7	0	0
133	7	0	0
134	7	0	0
135	7	0	0
136	7	0	0
137	7	1	0
138	7	0	0
139	7	0	0
140	7	0	0
141	7	0	0
142	7	0	0
143	7	1	1
144	7	0	0
145	7	1	0
146	7	0	0
147	7	0	0
148	7	0	1
149	7	0	0
150	7	1	0
151	7	0	0
152	7	1	1
153	7	1	1
154	7	0	0
155	7	0	0
156	7	0	0
157	7	1	0
158	7	0	0
159	7	1	0
160	7	0	0
161	7	1	1
162	7	0	0
163	7	0	0
164	7	0	0
165	7	1	1
166	7	1	1
167	7	0	0
168	7	0	0
169	7	1	1
170	7	0	0
171	7	0	0
172	7	0	0
173	7	0	0
174	7	0	0
175	7	0	0
176	7	0	0
177	7	0	0
178	7	1	0
179	7	0	0
180	7	1	0
181	7	0	0
182	7	0	0
183	7	0	0
184	7	1	1
185	7	1	1
186	7	1	1
187	7	0	0
188	7	0	0
189	7	0	0
190	7	0	0
191	7	0	0
192	7	0	0
193	7	0	0
194	7	0	0
195	7	0	0
196	7	0	0
197	7	0	0
198	7	0	0
199	7	0	0
[truncated: 1,901 more rows]

## Sheet: Study 2
Image	Rater	Set	Rating_Class_A	Rating_Class_B	Correct_Diagnosis_Class_A	Correct_Diagnosis_Class_B
1	1	1	1	1	1	1
1	2	1	1	1	1	1
1	7	1	1	1	1	1
1	8	1	0	1	1	1
1	14	1	0	0	1	1
2	1	1	0	0	0	0
2	2	1	0	0	0	0
2	7	1	0	0	0	0
2	8	1	0	0	0	0
2	14	1	0	0	0	0
3	1	1	1	1	1	1
3	2	1	1	1	1	1
3	7	1	1	1	1	1
3	8	1	1	1	1	1
3	14	1	1	1	1	1
4	1	1	0	0	0	0
4	2	1	0	0	0	0
4	7	1	1	1	0	0
4	8	1	0	1	0	0
4	14	1	0	1	0	0
5	1	1	1	1	1	1
5	2	1	1	1	1	1
5	7	1	1	1	1	1
5	8	1	0	1	1	1
5	14	1	1	1	1	1
6	1	1	1	1	0	0
6	2	1	0	1	0	0
6	7	1	1	1	0	0
6	8	1	1	1	0	0
6	14	1	1	1	0	0
7	1	1	0	0	0	0
7	2	1	0	0	0	0
7	7	1	0	0	0	0
7	8	1	0	0	0	0
7	14	1	0	0	0	0
8	1	1	1	1	1	1
8	2	1	0	1	1	1
8	7	1	1	1	1	1
8	8	1	1	1	1	1
8	14	1	1	1	1	1
9	1	1	0	1	0	1
9	2	1	1	1	0	1
9	7	1	0	1	0	1
9	8	1	1	1	0	1
9	14	1	1	1	0	1
10	1	1	0	0	0	0
10	2	1	1	1	0	0
10	7	1	1	1	0	0
10	8	1	0	0	0	0
10	14	1	0	0	0	0
11	1	1	0	1	0	0
11	2	1	0	1	0	0
11	7	1	1	1	0	0
11	8	1	0	0	0	0
11	14	1	0	1	0	0
12	1	1	0	0	0	0
12	2	1	0	0	0	0
12	7	1	1	1	0	0
12	8	1	0	0	0	0
12	14	1	0	0	0	0
13	1	1	1	1	1	1
13	2	1	1	1	1	1
13	7	1	1	1	1	1
13	8	1	1	1	1	1
13	14	1	1	1	1	1
14	1	1	1	1	0	0
14	2	1	0	0	0	0
14	7	1	1	1	0	0
14	8	1	0	0	0	0
14	14	1	0	0	0	0
15	1	1	1	1	0	0
15	2	1	0	1	0	0
15	7	1	0	1	0	0
15	8	1	0	0	0	0
15	14	1	0	0	0	0
16	1	1	1	1	1	1
16	2	1	0	1	1	1
16	7	1	1	1	1	1
16	8	1	1	1	1	1
16	14	1	1	1	1	1
17	1	1	1	1	0	1
17	2	1	0	0	0	1
17	7	1	0	1	0	1
17	8	1	0	1	0	1
17	14	1	0	0	0	1
18	1	1	1	1	0	1
18	2	1	0	1	0	1
18	7	1	0	1	0	1
18	8	1	0	1	0	1
18	14	1	0	1	0	1
19	1	1	0	1	0	0
19	2	1	0	0	0	0
19	7	1	0	1	0	0
19	8	1	0	0	0	0
19	14	1	0	0	0	0
20	1	1	1	1	1	1
20	2	1	1	1	1	1
20	7	1	1	1	1	1
20	8	1	1	1	1	1
20	14	1	1	1	1	1
21	1	1	1	1	0	0
21	2	1	0	0	0	0
21	7	1	1	1	0	0
21	8	1	0	0	0	0
21	14	1	0	0	0	0
22	1	1	1	1	1	1
22	2	1	1	1	1	1
22	7	1	1	1	1	1
22	8	1	1	1	1	1
22	14	1	1	1	1	1
23	1	1	1	1	0	1
23	2	1	0	0	0	1
23	7	1	1	1	0	1
23	8	1	0	0	0	1
23	14	1	0	0	0	1
24	1	1	0	0	0	0
24	2	1	0	0	0	0
24	7	1	0	0	0	0
24	8	1	0	0	0	0
24	14	1	0	0	0	0
25	1	1	1	1	0	0
25	2	1	0	1	0	0
25	7	1	1	1	0	0
25	8	1	0	0	0	0
25	14	1	0	0	0	0
26	1	1	1	1	0	1
26	2	1	0	1	0	1
26	7	1	0	1	0	1
26	8	1	0	0	0	1
26	14	1	0	0	0	1
27	1	1	0	0	0	0
27	2	1	0	0	0	0
27	7	1	0	1	0	0
27	8	1	0	0	0	0
27	14	1	0	0	0	0
28	1	1	1	1	1	1
28	2	1	1	1	1	1
28	7	1	1	1	1	1
28	8	1	1	1	1	1
28	14	1	1	1	1	1
29	1	1	0	0	0	0
29	2	1	0	0	0	0
29	7	1	0	0	0	0
29	8	1	0	0	0	0
29	14	1	0	0	0	0
30	1	1	1	1	0	1
30	2	1	0	1	0	1
30	7	1	0	1	0	1
30	8	1	1	1	0	1
30	14	1	0	0	0	1
31	1	1	1	1	1	1
31	2	1	0	0	1	1
31	7	1	1	1	1	1
31	8	1	1	1	1	1
31	14	1	0	0	1	1
32	1	1	1	1	0	1
32	2	1	0	0	0	1
32	7	1	0	1	0	1
32	8	1	0	1	0	1
32	14	1	0	0	0	1
33	1	1	1	1	0	1
33	2	1	1	1	0	1
33	7	1	1	1	0	1
33	8	1	0	1	0	1
33	14	1	0	1	0	1
34	1	1	0	0	0	0
34	2	1	0	0	0	0
34	7	1	0	1	0	0
34	8	1	0	0	0	0
34	14	1	0	1	0	0
35	1	1	0	1	0	0
35	2	1	0	0	0	0
35	7	1	0	1	0	0
35	8	1	0	0	0	0
35	14	1	0	0	0	0
36	1	1	0	0	0	0
36	2	1	0	0	0	0
36	7	1	0	0	0	0
36	8	1	0	0	0	0
36	14	1	0	0	0	0
37	1	1	1	1	0	1
37	2	1	1	1	0	1
37	7	1	1	1	0	1
37	8	1	1	1	0	1
37	14	1	1	1	0	1
38	1	1	0	1	0	1
38	2	1	1	1	0	1
38	7	1	0	1	0	1
38	8	1	1	1	0	1
38	14	1	0	1	0	1
39	1	1	1	1	0	1
39	2	1	0	0	0	1
39	7	1	1	1	0	1
39	8	1	0	0	0	1
39	14	1	0	0	0	1
40	1	1	1	1	0	0
40	2	1	1	1	0	0
40	7	1	1	1	0	0
40	8	1	0	1	0	0
40	14	1	1	1	0	0
41	1	1	1	1	1	1
41	2	1	1	1	1	1
41	7	1	1	1	1	1
41	8	1	1	1	1	1
41	14	1	1	1	1	1
42	1	1	1	1	0	0
42	2	1	1	1	0	0
42	7	1	1	1	0	0
42	8	1	0	1	0	0
42	14	1	1	1	0	0
43	1	1	1	1	0	0
43	2	1	0	0	0	0
43	7	1	0	0	0	0
43	8	1	0	1	0	0
43	14	1	0	0	0	0
44	1	1	1	1	1	1
44	2	1	0	1	1	1
44	7	1	1	1	1	1
44	8	1	1	1	1	1
44	14	1	1	1	1	1
45	1	1	1	1	1	1
45	2	1	1	1	1	1
45	7	1	1	1	1	1
45	8	1	1	1	1	1
45	14	1	1	1	1	1
46	1	1	1	1	1	1
46	2	1	1	1	1	1
46	7	1	1	1	1	1
46	8	1	1	1	1	1
46	14	1	1	1	1	1
47	1	1	1	1	1	1
47	2	1	1	1	1	1
47	7	1	0	1	1	1
47	8	1	1	1	1	1
47	14	1	1	1	1	1
48	1	1	1	1	0	1
48	2	1	1	1	0	1
48	7	1	1	1	0	1
48	8	1	1	1	0	1
48	14	1	1	1	0	1
49	1	1	0	1	0	0
49	2	1	0	0	0	0
49	7	1	0	1	0	0
49	8	1	0	1	0	0
49	14	1	0	0	0	0
50	1	1	1	1	1	1
50	2	1	1	1	1	1
50	7	1	1	1	1	1
50	8	1	1	1	1	1
50	14	1	1	1	1	1
51	1	1	0	0	0	0
51	2	1	0	0	0	0
51	7	1	0	0	0	0
51	8	1	0	0	0	0
51	14	1	0	0	0	0
52	1	1	1	1	0	1
52	2	1	1	1	0	1
52	7	1	1	1	0	1
52	8	1	0	0	0	1
52	14	1	0	0	0	1
53	1	1	1	1	1	1
53	2	1	1	1	1	1
53	7	1	0	1	1	1
53	8	1	1	1	1	1
53	14	1	0	1	1	1
54	1	1	0	1	0	0
54	2	1	0	0	0	0
54	7	1	1	1	0	0
54	8	1	0	0	0	0
54	14	1	0	0	0	0
55	1	1	0	1	0	1
55	2	1	0	0	0	1
55	7	1	1	1	0	1
55	8	1	0	0	0	1
55	14	1	0	0	0	1
56	1	1	1	1	1	1
56	2	1	1	1	1	1
56	7	1	0	1	1	1
56	8	1	1	1	1	1
56	14	1	1	1	1	1
57	1	1	0	1	0	1
57	2	1	1	1	0	1
57	7	1	0	0	0	1
57	8	1	0	1	0	1
57	14	1	1	1	0	1
58	1	1	1	1	1	1
58	2	1	1	1	1	1
58	7	1	0	1	1	1
58	8	1	0	1	1	1
58	14	1	1	1	1	1
59	1	1	1	1	0	0
59	2	1	0	0	0	0
59	7	1	0	0	0	0
59	8	1	1	1	0	0
59	14	1	1	1	0	0
60	1	1	1	1	1	1
60	2	1	1	1	1	1
60	7	1	1	1	1	1
60	8	1	1	1	1	1
60	14	1	0	0	1	1
61	1	1	1	1	1	1
61	2	1	0	1	1	1
61	7	1	1	1	1	1
61	8	1	1	1	1	1
61	14	1	0	1	1	1
62	1	1	0	1	1	1
62	2	1	0	1	1	1
62	7	1	1	1	1	1
62	8	1	1	1	1	1
62	14	1	1	1	1	1
63	1	1	0	0	0	0
63	2	1	0	0	0	0
63	7	1	0	0	0	0
63	8	1	0	0	0	0
63	14	1	0	0	0	0
64	1	1	1	1	0	0
64	2	1	1	1	0	0
64	7	1	1	1	0	0
64	8	1	1	1	0	0
64	14	1	1	1	0	0
65	1	1	1	1	1	1
65	2	1	1	1	1	1
65	7	1	1	1	1	1
65	8	1	1	1	1	1
65	14	1	1	1	1	1
66	1	1	0	1	0	0
66	2	1	0	0	0	0
66	7	1	0	0	0	0
66	8	1	0	0	0	0
66	14	1	0	0	0	0
67	1	1	0	0	0	0
67	2	1	1	1	0	0
67	7	1	0	0	0	0
67	8	1	1	1	0	0
67	14	1	0	0	0	0
68	1	1	1	1	0	1
68	2	1	0	0	0	1
68	7	1	0	0	0	1
68	8	1	0	1	0	1
68	14	1	0	0	0	1
69	1	1	1	1	0	0
69	2	1	0	0	0	0
69	7	1	0	0	0	0
69	8	1	0	0	0	0
69	14	1	0	0	0	0
70	1	1	1	1	0	0
70	2	1	0	0	0	0
70	7	1	0	1	0	0
70	8	1	0	1	0	0
70	14	1	1	1	0	0
71	1	1	0	1	0	1
71	2	1	0	0	0	1
71	7	1	0	0	0	1
71	8	1	0	0	0	1
71	14	1	1	1	0	1
72	1	1	1	1	0	0
72	2	1	0	0	0	0
72	7	1	0	1	0	0
72	8	1	0	1	0	0
72	14	1	1	1	0	0
73	1	1	1	1	0	0
73	2	1	0	0	0	0
73	7	1	0	0	0	0
73	8	1	0	1	0	0
73	14	1	0	0	0	0
74	1	1	1	1	1	1
74	2	1	1	1	1	1
74	7	1	0	1	1	1
74	8	1	1	1	1	1
74	14	1	1	1	1	1
75	1	1	1	1	0	0
75	2	1	0	0	0	0
75	7	1	0	0	0	0
75	8	1	0	0	0	0
75	14	1	0	0	0	0
76	1	1	0	1	0	1
76	2	1	0	0	0	1
76	7	1	0	0	0	1
76	8	1	1	1	0	1
76	14	1	0	0	0	1
77	1	1	1	1	1	1
77	2	1	1	1	1	1
77	7	1	0	1	1	1
77	8	1	0	1	1	1
77	14	1	1	1	1	1
78	1	1	1	1	0	1
78	2	1	0	0	0	1
78	7	1	0	1	0	1
78	8	1	0	0	0	1
78	14	1	0	1	0	1
79	1	1	1	1	0	0
79	2	1	0	0	0	0
79	7	1	0	1	0	0
79	8	1	0	0	0	0
79	14	1	1	1	0	0
80	1	1	1	1	0	1
80	2	1	1	1	0	1
80	7	1	0	0	0	1
80	8	1	0	1	0	1
80	14	1	0	1	0	1
81	1	1	0	0	0	1
81	2	1	0	0	0	1
81	7	1	0	1	0	1
81	8	1	0	0	0	1
81	14	1	0	0	0	1
82	1	1	1	1	0	1
82	2	1	0	0	0	1
82	7	1	0	0	0	1
82	8	1	1	1	0	1
82	14	1	0	1	0	1
83	1	1	1	1	1	1
83	2	1	1	1	1	1
83	7	1	1	1	1	1
83	8	1	1	1	1	1
83	14	1	1	1	1	1
84	1	1	1	1	0	0
84	2	1	0	0	0	0
84	7	1	0	1	0	0
84	8	1	1	1	0	0
84	14	1	0	0	0	0
85	1	1	1	1	1	1
85	2	1	0	1	1	1
85	7	1	0	0	1	1
85	8	1	1	1	1	1
85	14	1	0	1	1	1
86	1	1	1	1	1	1
86	2	1	1	1	1	1
86	7	1	0	1	1	1
86	8	1	0	1	1	1
86	14	1	1	1	1	1
87	1	1	1	1	0	0
87	2	1	1	1	0	0
87	7	1	1	1	0	0
87	8	1	1	1	0	0
87	14	1	1	1	0	0
88	1	1	1	1	0	0
88	2	1	0	0	0	0
88	7	1	0	1	0	0
88	8	1	0	0	0	0
88	14	1	0	0	0	0
89	1	1	1	1	0	0
89	2	1	0	1	0	0
89	7	1	0	1	0	0
89	8	1	0	1	0	0
89	14	1	0	0	0	0
90	1	1	1	1	1	1
90	2	1	1	1	1	1
90	7	1	0	1	1	1
90	8	1	1	1	1	1
90	14	1	0	1	1	1
91	1	1	1	1	1	1
91	2	1	1	1	1	1
91	7	1	1	1	1	1
91	8	1	1	1	1	1
91	14	1	1	1	1	1
92	1	1	1	1	1	1
92	2	1	1	1	1	1
92	7	1	1	1	1	1
92	8	1	1	1	1	1
92	14	1	1	1	1	1
93	1	1	1	1	0	0
93	2	1	1	1	0	0
93	7	1	1	1	0	0
93	8	1	1	1	0	0
93	14	1	0	0	0	0
94	1	1	0	0	0	0
94	2	1	0	0	0	0
94	7	1	0	0	0	0
94	8	1	0	0	0	0
94	14	1	0	0	0	0
95	1	1	0	1	0	0
95	2	1	0	1	0	0
95	7	1	1	1	0	0
95	8	1	0	1	0	0
95	14	1	1	1	0	0
96	1	1	1	1	0	1
96	2	1	1	1	0	1
96	7	1	1	1	0	1
96	8	1	0	0	0	1
96	14	1	0	0	0	1
97	1	1	0	0	0	0
97	2	1	1	1	0	0
97	7	1	0	0	0	0
97	8	1	0	0	0	0
97	14	1	0	0	0	0
98	1	1	1	1	0	1
98	2	1	1	1	0	1
98	7	1	0	0	0	1
98	8	1	1	1	0	1
98	14	1	1	1	0	1
99	1	1	1	1	1	1
99	2	1	1	1	1	1
99	7	1	1	1	1	1
99	8	1	1	1	1	1
99	14	1	0	1	1	1
100	1	1	1	1	0	1
100	2	1	1	1	0	1
100	7	1	1	1	0	1
100	8	1	1	1	0	1
100	14	1	1	1	0	1
101	3	2	0	0	1	1
101	4	2	1	1	1	1
101	10	2	1	1	1	1
101	15	2	1	1	1	1
101	16	2	1	1	1	1
102	3	2	0	0	0	0
102	4	2	0	0	0	0
102	10	2	0	1	0	0
102	15	2	0	0	0	0
102	16	2	0	1	0	0
103	3	2	0	0	0	1
103	4	2	0	0	0	1
103	10	2	1	1	0	1
103	15	2	1	1	0	1
103	16	2	1	1	0	1
104	3	2	0	0	0	0
104	4	2	0	0	0	0
104	10	2	0	0	0	0
104	15	2	0	0	0	0
104	16	2	0	0	0	0
105	3	2	0	0	0	0
105	4	2	0	0	0	0
105	10	2	0	0	0	0
105	15	2	0	0	0	0
105	16	2	0	0	0	0
106	3	2	0	0	0	0
106	4	2	0	1	0	0
106	10	2	0	1	0	0
106	15	2	0	0	0	0
106	16	2	0	0	0	0
107	3	2	0	0	0	0
107	4	2	0	0	0	0
107	10	2	0	0	0	0
107	15	2	0	0	0	0
107	16	2	0	0	0	0
108	3	2	1	1	1	1
108	4	2	0	0	1	1
108	10	2	1	1	1	1
108	15	2	1	1	1	1
108	16	2	1	1	1	1
109	3	2	0	1	1	1
109	4	2	1	1	1	1
109	10	2	1	1	1	1
109	15	2	0	0	1	1
109	16	2	0	1	1	1
110	3	2	0	0	0	1
110	4	2	0	0	0	1
110	10	2	0	1	0	1
110	15	2	1	1	0	1
110	16	2	0	0	0	1
111	3	2	0	0	0	0
111	4	2	0	1	0	0
111	10	2	0	0	0	0
111	15	2	0	0	0	0
112	3	2	0	0	0	0
112	4	2	0	1	0	0
112	10	2	0	0	0	0
112	15	2	0	0	0	0
112	16	2	0	0	0	0
113	3	2	0	0	0	1
113	4	2	0	1	0	1
113	10	2	0	0	0	1
113	15	2	1	1	0	1
113	16	2	0	0	0	1
114	3	2	0	0	0	0
114	4	2	0	1	0	0
114	10	2	0	0	0	0
114	15	2	0	0	0	0
114	16	2	0	0	0	0
115	3	2	0	1	1	1
115	4	2	1	1	1	1
115	10	2	1	1	1	1
115	15	2	1	1	1	1
115	16	2	1	1	1	1
116	3	2	1	1	0	0
116	4	2	0	1	0	0
116	10	2	0	1	0	0
116	15	2	0	0	0	0
116	16	2	1	1	0	0
117	3	2	1	1	1	1
117	4	2	1	1	1	1
117	10	2	1	1	1	1
117	15	2	1	1	1	1
117	16	2	1	1	1	1
118	3	2	0	0	0	0
118	4	2	0	1	0	0
118	10	2	0	0	0	0
118	15	2	0	0	0	0
118	16	2	0	0	0	0
119	3	2	0	1	1	1
119	4	2	0	0	1	1
119	10	2	1	1	1	1
119	15	2	0	1	1	1
119	16	2	0	1	1	1
120	3	2	0	0	0	1
120	4	2	0	0	0	1
120	10	2	0	0	0	1
120	15	2	1	1	0	1
120	16	2	0	0	0	1
121	3	2	0	1	0	0
121	4	2	0	1	0	0
121	10	2	1	1	0	0
121	15	2	1	1	0	0
121	16	2	1	1	0	0
122	3	2	1	1	0	0
122	4	2	1	1	0	0
122	10	2	1	1	0	0
122	15	2	1	1	0	0
122	16	2	0	0	0	0
123	3	2	0	0	0	0
123	4	2	0	0	0	0
123	10	2	0	0	0	0
123	15	2	0	0	0	0
123	16	2	0	0	0	0
124	3	2	1	1	0	0
124	4	2	0	1	0	0
124	10	2	1	1	0	0
124	15	2	0	0	0	0
124	16	2	0	0	0	0
125	3	2	1	1	0	1
125	4	2	0	1	0	1
125	10	2	1	1	0	1
125	15	2	0	0	0	1
125	16	2	0	1	0	1
126	3	2	0	0	0	0
126	4	2	0	1	0	0
126	10	2	0	1	0	0
126	15	2	0	0	0	0
126	16	2	0	1	0	0
127	3	2	1	1	0	1
127	4	2	1	1	0	1
127	10	2	0	1	0	1
127	15	2	0	1	0	1
127	16	2	1	1	0	1
128	3	2	0	0	0	0
128	4	2	0	1	0	0
128	10	2	0	1	0	0
128	15	2	0	0	0	0
128	16	2	0	0	0	0
129	3	2	0	0	1	1
129	4	2	1	1	1	1
129	10	2	1	1	1	1
129	15	2	1	1	1	1
129	16	2	1	1	1	1
130	3	2	1	1	1	1
130	4	2	0	1	1	1
130	10	2	1	1	1	1
130	15	2	0	1	1	1
130	16	2	1	1	1	1
131	3	2	0	0	0	1
131	4	2	1	1	0	1
131	10	2	0	1	0	1
131	15	2	0	1	0	1
131	16	2	0	0	0	1
132	3	2	0	1	0	0
132	4	2	1	1	0	0
132	10	2	0	1	0	0
132	15	2	0	0	0	0
132	16	2	0	0	0	0
133	3	2	1	1	1	1
133	4	2	1	1	1	1
133	10	2	0	1	1	1
133	15	2	0	1	1	1
133	16	2	1	1	1	1
134	3	2	0	0	0	0
134	4	2	0	1	0	0
134	10	2	0	1	0	0
134	15	2	1	1	0	0
134	16	2	0	0	0	0
135	3	2	0	1	0	1
135	4	2	1	1	0	1
135	10	2	0	1	0	1
135	15	2	0	1	0	1
135	16	2	0	0	0	1
136	3	2	0	1	0	0
136	4	2	1	1	0	0
136	10	2	0	1	0	0
136	15	2	1	1	0	0
136	16	2	0	0	0	0
137	3	2	0	0	0	0
137	4	2	1	1	0	0
137	10	2	0	0	0	0
137	15	2	0	1	0	0
137	16	2	0	0	0	0
138	3	2	1	1	1	1
138	4	2	0	1	1	1
138	10	2	1	1	1	1
138	15	2	1	1	1	1
138	16	2	1	1	1	1
139	3	2	1	1	0	1
139	4	2	1	1	0	1
139	10	2	1	1	0	1
139	15	2	1	1	0	1
139	16	2	0	1	0	1
140	3	2	1	1	0	0
140	4	2	1	1	0	0
140	10	2	0	1	0	0
140	15	2	0	1	0	0
140	16	2	0	1	0	0
141	3	2	0	0	0	1
141	4	2	0	0	0	1
141	10	2	0	1	0	1
141	15	2	0	0	0	1
141	16	2	1	1	0	1
142	3	2	1	1	1	1
142	4	2	1	1	1	1
142	10	2	1	1	1	1
142	15	2	1	1	1	1
142	16	2	1	1	1	1
143	3	2	0	1	1	1
143	4	2	1	1	1	1
143	10	2	1	1	1	1
143	15	2	0	0	1	1
143	16	2	1	1	1	1
144	3	2	0	1	0	1
144	4	2	0	1	0	1
144	10	2	0	1	0	1
144	15	2	0	1	0	1
144	16	2	1	1	0	1
145	3	2	1	1	0	1
145	4	2	1	1	0	1
145	10	2	1	1	0	1
145	15	2	1	1	0	1
145	16	2	1	1	0	1
146	3	2	0	0	1	1
146	4	2	0	0	1	1
146	10	2	0	1	1	1
146	15	2	0	0	1	1
146	16	2	0	0	1	1
147	3	2	0	0	0	0
147	4	2	0	0	0	0
147	10	2	0	1	0	0
147	15	2	0	0	0	0
147	16	2	0	0	0	0
148	3	2	0	1	0	1
148	4	2	1	1	0	1
148	10	2	0	1	0	1
148	15	2	0	0	0	1
148	16	2	0	1	0	1
149	3	2	0	1	1	1
149	4	2	1	1	1	1
149	10	2	1	1	1	1
149	15	2	1	1	1	1
149	16	2	1	1	1	1
150	3	2	0	0	1	1
150	4	2	0	1	1	1
150	10	2	0	1	1	1
150	15	2	1	1	1	1
150	16	2	0	0	1	1
151	3	2	0	0	1	1
151	4	2	1	1	1	1
151	10	2	0	1	1	1
151	15	2	0	1	1	1
151	16	2	1	1	1	1
152	3	2	0	0	0	1
152	4	2	0	0	0	1
152	10	2	0	1	0	1
152	15	2	0	0	0	1
152	16	2	0	0	0	1
153	3	2	0	0	0	0
153	4	2	0	0	0	0
153	10	2	0	1	0	0
153	15	2	1	1	0	0
153	16	2	0	0	0	0
154	3	2	0	0	0	0
154	4	2	0	0	0	0
154	10	2	0	1	0	0
154	15	2	0	0	0	0
154	16	2	0	0	0	0
155	3	2	0	0	0	0
155	4	2	0	1	0	0
155	10	2	0	0	0	0
155	15	2	0	0	0	0
155	16	2	0	0	0	0
156	3	2	1	1	0	1
156	4	2	1	1	0	1
156	10	2	0	1	0	1
156	15	2	0	1	0	1
156	16	2	0	0	0	1
157	3	2	0	1	1	1
157	4	2	1	1	1	1
157	10	2	0	1	1	1
157	15	2	0	0	1	1
157	16	2	1	1	1	1
158	3	2	1	1	0	0
158	4	2	0	1	0	0
158	10	2	0	1	0	0
158	15	2	1	1	0	0
158	16	2	0	1	0	0
159	3	2	0	0	1	1
159	4	2	1	1	1	1
159	10	2	1	1	1	1
159	15	2	1	1	1	1
159	16	2	1	1	1	1
160	3	2	1	1	1	1
160	4	2	1	1	1	1
160	10	2	1	1	1	1
160	15	2	1	1	1	1
160	16	2	1	1	1	1
161	3	2	0	0	0	0
161	4	2	0	0	0	0
161	10	2	0	1	0	0
161	15	2	0	0	0	0
161	16	2	0	0	0	0
162	3	2	0	0	0	0
162	4	2	0	0	0	0
162	10	2	0	0	0	0
162	15	2	0	0	0	0
162	16	2	0	0	0	0
163	3	2	0	0	1	1
163	4	2	0	1	1	1
163	10	2	1	1	1	1
163	15	2	1	1	1	1
163	16	2	1	1	1	1
164	3	2	0	0	0	0
164	4	2	0	0	0	0
164	10	2	0	0	0	0
164	15	2	0	0	0	0
164	16	2	0	0	0	0
165	3	2	0	1	1	1
165	4	2	0	0	1	1
165	10	2	0	1	1	1
165	15	2	0	0	1	1
165	16	2	0	0	1	1
166	3	2	1	1	1	1
166	4	2	0	1	1	1
166	10	2	1	1	1	1
166	15	2	1	1	1	1
166	16	2	1	1	1	1
167	3	2	0	0	0	1
167	4	2	1	1	0	1
167	10	2	1	1	0	1
167	15	2	0	1	0	1
167	16	2	1	1	0	1
168	3	2	0	1	0	1
168	4	2	0	1	0	1
168	10	2	0	1	0	1
168	15	2	0	1	0	1
168	16	2	0	1	0	1
169	3	2	1	1	1	1
169	4	2	0	0	1	1
169	10	2	0	0	1	1
169	15	2	0	0	1	1
169	16	2	1	1	1	1
170	3	2	0	0	0	0
170	4	2	0	0	0	0
170	10	2	0	0	0	0
170	15	2	0	0	0	0
170	16	2	0	0	0	0
171	3	2	0	0	0	1
171	4	2	0	0	0	1
171	10	2	0	0	0	1
171	15	2	0	0	0	1
171	16	2	0	0	0	1
172	3	2	1	1	1	1
172	4	2	1	1	1	1
172	10	2	1	1	1	1
172	15	2	0	1	1	1
172	16	2	0	1	1	1
173	3	2	1	1	1	1
173	4	2	0	1	1	1
173	10	2	1	1	1	1
173	15	2	1	1	1	1
173	16	2	0	0	1	1
174	3	2	0	0	0	1
174	4	2	1	1	0	1
174	10	2	0	0	0	1
174	15	2	0	0	0	1
174	16	2	0	0	0	1
175	3	2	0	1	0	0
175	4	2	1	1	0	0
175	10	2	1	1	0	0
175	15	2	0	1	0	0
175	16	2	1	1	0	0
176	3	2	0	0	0	0
176	4	2	0	0	0	0
176	10	2	0	0	0	0
176	15	2	0	0	0	0
176	16	2	0	0	0	0
177	3	2	0	1	0	0
177	4	2	1	1	0	0
177	10	2	0	1	0	0
177	15	2	1	1	0	0
177	16	2	1	1	0	0
178	3	2	0	0	0	0
178	4	2	0	1	0	0
178	10	2	0	0	0	0
178	15	2	0	1	0	0
178	16	2	0	0	0	0
179	3	2	1	1	0	0
179	4	2	0	0	0	0
179	10	2	0	0	0	0
179	15	2	0	0	0	0
179	16	2	0	0	0	0
180	3	2	0	0	0	0
180	4	2	0	0	0	0
180	10	2	0	0	0	0
180	15	2	0	0	0	0
180	16	2	0	0	0	0
181	3	2	1	1	0	1
181	4	2	1	1	0	1
181	10	2	0	0	0	1
181	15	2	0	0	0	1
181	16	2	0	0	0	1
182	3	2	0	0	0	0
182	4	2	0	1	0	0
182	10	2	0	1	0	0
182	15	2	0	0	0	0
182	16	2	0	0	0	0
183	3	2	0	1	0	1
183	4	2	0	1	0	1
183	10	2	0	1	0	1
183	15	2	0	1	0	1
183	16	2	1	1	0	1
184	3	2	0	0	0	0
184	4	2	0	0	0	0
184	10	2	0	0	0	0
184	15	2	0	0	0	0
184	16	2	0	0	0	0
185	3	2	0	1	0	1
185	4	2	1	1	0	1
185	10	2	0	1	0	1
185	15	2	0	1	0	1
185	16	2	0	1	0	1
186	3	2	0	0	0	0
186	4	2	0	0	0	0
186	10	2	0	1	0	0
186	15	2	1	1	0	0
186	16	2	0	0	0	0
187	3	2	1	1	0	1
187	4	2	0	1	0	1
187	10	2	0	1	0	1
187	15	2	1	1	0	1
187	16	2	0	1	0	1
188	3	2	1	1	0	1
188	4	2	1	1	0	1
188	10	2	0	1	0	1
188	15	2	0	1	0	1
188	16	2	1	1	0	1
189	3	2	0	1	1	1
189	4	2	1	1	1	1
189	10	2	1	1	1	1
189	15	2	0	1	1	1
189	16	2	1	1	1	1
190	3	2	0	1	0	0
190	4	2	0	1	0	0
190	10	2	0	0	0	0
190	15	2	0	0	0	0
190	16	2	0	1	0	0
191	3	2	0	1	0	0
191	4	2	1	1	0	0
191	10	2	0	1	0	0
191	15	2	1	1	0	0
191	16	2	0	1	0	0
192	3	2	0	0	0	0
192	4	2	0	0	0	0
192	10	2	1	1	0	0
192	15	2	0	0	0	0
192	16	2	0	0	0	0
193	3	2	1	1	1	1
193	4	2	0	1	1	1
193	10	2	1	1	1	1
193	15	2	1	1	1	1
193	16	2	1	1	1	1
194	3	2	0	1	0	0
194	4	2	1	1	0	0
194	10	2	1	1	0	0
194	15	2	0	1	0	0
194	16	2	0	1	0	0
195	3	2	1	1	1	1
195	4	2	1	1	1	1
195	10	2	1	1	1	1
195	15	2	1	1	1	1
195	16	2	1	1	1	1
196	3	2	1	1	1	1
196	4	2	1	1	1	1
196	10	2	0	1	1	1
196	15	2	1	1	1	1
196	16	2	0	1	1	1
197	3	2	0	0	0	1
197	4	2	0	0	0	1
197	10	2	0	0	0	1
197	15	2	0	0	0	1
197	16	2	0	0	0	1
198	3	2	0	1	0	1
198	4	2	1	1	0	1
198	10	2	1	1	0	1
198	15	2	0	1	0	1
198	16	2	0	1	0	1
199	3	2	0	1	1	1
199	4	2	0	1	1	1
199	10	2	0	1	1	1
199	15	2	0	0	1	1
199	16	2	1	1	1	1
200	3	2	0	0	0	0
200	4	2	0	0	0	0
200	10	2	0	0	0	0
200	15	2	0	0	0	0
200	16	2	0	0	0	0
201	5	3	0	0	0	1
201	6	3	0	1	0	1
201	11	3	1	1	0	1
201	17	3	0	1	0	1
202	5	3	0	0	0	0
202	6	3	1	1	0	0
202	11	3	0	0	0	0
202	17	3	0	0	0	0
203	5	3	0	0	0	0
203	6	3	1	1	0	0
203	11	3	1	1	0	0
203	17	3	1	1	0	0
204	5	3	0	0	0	0
204	6	3	0	0	0	0
204	11	3	0	0	0	0
204	17	3	0	0	0	0
205	5	3	1	1	1	1
205	6	3	1	1	1	1
205	11	3	1	1	1	1
205	17	3	0	1	1	1
206	5	3	1	1	1	1
206	6	3	0	1	1	1
206	11	3	1	1	1	1
206	17	3	0	1	1	1
207	5	3	0	0	0	0
207	6	3	0	0	0	0
207	11	3	0	0	0	0
207	17	3	0	0	0	0
208	5	3	1	1	0	1
208	6	3	1	1	0	1
208	11	3	1	1	0	1
208	17	3	0	1	0	1
209	5	3	1	1	1	1
209	6	3	1	1	1	1
209	11	3	1	1	1	1
209	17	3	1	1	1	1
210	5	3	1	1	1	1
210	6	3	1	1	1	1
210	11	3	1	1	1	1
210	17	3	1	1	1	1
211	5	3	0	0	0	0
211	6	3	1	1	0	0
211	11	3	0	0	0	0
211	17	3	0	0	0	0
212	5	3	1	1	0	0
212	6	3	1	1	0	0
212	11	3	1	1	0	0
212	17	3	0	1	0	0
213	5	3	0	0	1	1
213	6	3	1	1	1	1
213	11	3	1	1	1	1
213	17	3	1	1	1	1
214	5	3	0	0	1	1
214	6	3	0	1	1	1
214	11	3	1	1	1	1
214	17	3	0	1	1	1
215	5	3	1	1	0	1
215	6	3	0	0	0	1
215	11	3	1	1	0	1
215	17	3	0	0	0	1
216	5	3	0	0	1	1
216	6	3	0	1	1	1
216	11	3	1	1	1	1
216	17	3	0	1	1	1
217	5	3	1	1	1	1
217	6	3	1	1	1	1
217	11	3	0	1	1	1
217	17	3	0	1	1	1
218	5	3	0	0	0	0
218	6	3	0	0	0	0
218	11	3	0	0	0	0
218	17	3	0	0	0	0
219	5	3	1	1	1	1
219	6	3	1	1	1	1
219	11	3	1	1	1	1
219	17	3	1	1	1	1
220	5	3	1	1	0	0
220	6	3	0	0	0	0
220	11	3	0	1	0	0
220	17	3	0	0	0	0
221	5	3	0	0	0	0
221	6	3	0	0	0	0
221	11	3	0	1	0	0
221	17	3	0	0	0	0
222	5	3	0	0	0	0
222	6	3	0	0	0	0
222	11	3	0	0	0	0
222	17	3	0	0	0	0
223	5	3	1	1	1	1
223	6	3	1	1	1	1
223	11	3	1	1	1	1
223	17	3	1	1	1	1
224	5	3	0	0	0	0
224	6	3	0	0	0	0
224	11	3	0	0	0	0
224	17	3	0	0	0	0
225	5	3	0	0	0	0
225	6	3	0	0	0	0
225	11	3	0	0	0	0
225	17	3	0	0	0	0
226	5	3	0	0	0	0
226	6	3	0	0	0	0
226	11	3	0	0	0	0
226	17	3	0	0	0	0
227	5	3	0	1	0	1
227	6	3	1	1	0	1
227	11	3	1	1	0	1
227	17	3	0	1	0	1
228	5	3	0	0	0	1
228	6	3	1	1	0	1
228	11	3	0	1	0	1
228	17	3	0	0	0	1
229	5	3	0	0	0	1
229	6	3	0	1	0	1
229	11	3	1	1	0	1
229	17	3	1	1	0	1
230	5	3	0	0	0	1
230	6	3	1	1	0	1
230	11	3	1	1	0	1
230	17	3	1	1	0	1
231	5	3	0	0	0	1
231	6	3	0	1	0	1
231	11	3	1	1	0	1
231	17	3	0	1	0	1
232	5	3	1	1	0	0
232	6	3	0	0	0	0
232	11	3	0	0	0	0
232	17	3	0	0	0	0
233	5	3	0	0	1	1
233	6	3	1	1	1	1
233	11	3	1	1	1	1
233	17	3	0	1	1	1
234	5	3	0	0	0	0
234	6	3	0	1	0	0
234	11	3	0	1	0	0
234	17	3	0	0	0	0
235	5	3	0	0	1	1
235	6	3	0	0	1	1
235	11	3	1	1	1	1
235	17	3	0	1	1	1
236	5	3	1	1	1	1
236	6	3	1	1	1	1
236	11	3	1	1	1	1
236	17	3	0	1	1	1
237	5	3	0	0	0	0
237	6	3	0	0	0	0
237	11	3	0	0	0	0
237	17	3	0	0	0	0
238	5	3	0	0	0	0
238	6	3	1	1	0	0
238	11	3	0	0	0	0
238	17	3	0	0	0	0
239	5	3	0	0	0	0
239	6	3	0	0	0	0
239	11	3	1	1	0	0
239	17	3	0	1	0	0
240	5	3	0	0	0	0
240	6	3	0	0	0	0
240	11	3	0	1	0	0
240	17	3	0	1	0	0
241	5	3	0	0	0	0
241	6	3	0	0	0	0
241	11	3	0	1	0	0
241	17	3	0	0	0	0
242	5	3	1	1	0	1
242	6	3	0	0	0	1
242	11	3	1	1	0	1
242	17	3	0	1	0	1
243	5	3	0	0	0	1
243	6	3	0	0	0	1
243	11	3	0	1	0	1
243	17	3	0	0	0	1
244	5	3	0	0	0	1
244	6	3	0	0	0	1
244	11	3	0	1	0	1
244	17	3	1	1	0	1
245	5	3	0	0	0	0
245	6	3	0	0	0	0
245	11	3	0	0	0	0
245	17	3	0	0	0	0
246	5	3	1	1	1	1
246	6	3	0	1	1	1
246	11	3	1	1	1	1
246	17	3	1	1	1	1
247	5	3	0	0	1	1
247	6	3	0	0	1	1
247	11	3	0	1	1	1
247	17	3	0	1	1	1
248	5	3	0	0	0	1
248	6	3	0	0	0	1
248	11	3	0	0	0	1
248	17	3	0	1	0	1
249	5	3	0	1	1	1
249	6	3	0	1	1	1
249	11	3	1	1	1	1
249	17	3	0	0	1	1
250	5	3	0	1	0	1
250	6	3	0	0	0	1
250	11	3	1	1	0	1
250	17	3	0	1	0	1
251	5	3	1	1	0	1
251	6	3	0	0	0	1
251	11	3	0	0	0	1
251	17	3	0	0	0	1
252	5	3	1	1	0	1
252	6	3	0	0	0	1
252	11	3	0	1	0	1
252	17	3	0	0	0	1
253	5	3	0	0	0	0
253	6	3	0	0	0	0
253	11	3	0	1	0	0
253	17	3	0	0	0	0
254	5	3	0	0	0	0
254	6	3	0	0	0	0
254	11	3	1	1	0	0
254	17	3	0	0	0	0
255	5	3	1	1	1	1
255	6	3	0	1	1	1
255	11	3	1	1	1	1
255	17	3	1	1	1	1
256	5	3	0	1	0	0
256	6	3	0	0	0	0
256	11	3	0	1	0	0
256	17	3	0	0	0	0
257	5	3	1	1	1	1
257	6	3	1	1	1	1
257	11	3	1	1	1	1
257	17	3	1	1	1	1
258	5	3	1	1	0	0
258	6	3	0	0	0	0
258	11	3	0	1	0	0
258	17	3	0	0	0	0
259	5	3	0	0	0	0
259	6	3	0	0	0	0
259	11	3	0	0	0	0
259	17	3	0	0	0	0
260	5	3	0	0	0	1
260	6	3	0	0	0	1
260	11	3	0	0	0	1
260	17	3	0	0	0	1
261	5	3	1	1	0	1
261	6	3	1	1	0	1
261	11	3	1	1	0	1
261	17	3	0	0	0	1
262	5	3	1	1	1	1
262	6	3	0	1	1	1
262	11	3	1	1	1	1
262	17	3	1	1	1	1
263	5	3	1	1	1	1
263	6	3	1	1	1	1
263	11	3	1	1	1	1
263	17	3	0	1	1	1
264	5	3	0	0	1	1
264	6	3	1	1	1	1
264	11	3	1	1	1	1
264	17	3	0	1	1	1
265	5	3	0	0	0	1
265	6	3	0	0	0	1
265	11	3	0	0	0	1
265	17	3	0	0	0	1
266	5	3	1	1	0	0
266	6	3	0	0	0	0
266	11	3	0	1	0	0
266	17	3	0	0	0	0
267	5	3	1	1	0	1
267	6	3	0	1	0	1
267	11	3	1	1	0	1
267	17	3	0	1	0	1
268	5	3	0	0	0	0
268	6	3	0	0	0	0
268	11	3	0	0	0	0
268	17	3	0	0	0	0
269	5	3	0	0	0	1
269	6	3	0	0	0	1
269	11	3	0	0	0	1
269	17	3	0	0	0	1
270	5	3	0	0	0	1
270	6	3	0	0	0	1
270	11	3	0	1	0	1
270	17	3	0	0	0	1
271	5	3	0	0	0	0
271	6	3	0	0	0	0
271	11	3	0	1	0	0
271	17	3	0	0	0	0
272	5	3	0	0	1	1
272	6	3	0	0	1	1
272	11	3	0	1	1	1
272	17	3	0	0	1	1
273	5	3	0	0	0	0
273	6	3	0	0	0	0
273	11	3	1	1	0	0
273	17	3	0	1	0	0
274	5	3	1	1	1	1
274	6	3	1	1	1	1
274	11	3	1	1	1	1
274	17	3	1	1	1	1
275	5	3	0	0	0	0
275	6	3	0	0	0	0
275	11	3	0	0	0	0
275	17	3	0	0	0	0
276	5	3	1	1	1	1
276	6	3	1	1	1	1
276	11	3	1	1	1	1
276	17	3	1	1	1	1
277	5	3	0	0	0	1
277	6	3	0	0	0	1
277	11	3	0	1	0	1
277	17	3	0	1	0	1
278	5	3	0	0	0	1
278	6	3	0	0	0	1
278	11	3	0	1	0	1
278	17	3	0	1	0	1
279	5	3	0	0	1	1
279	6	3	0	0	1	1
279	11	3	0	1	1	1
279	17	3	0	1	1	1
280	5	3	1	1	1	1
280	6	3	1	1	1	1
280	11	3	0	1	1	1
280	17	3	0	1	1	1
281	5	3	0	0	0	0
281	6	3	0	0	0	0
281	11	3	0	0	0	0
281	17	3	0	0	0	0
282	5	3	0	0	0	0
282	6	3	0	0	0	0
282	11	3	0	0	0	0
282	17	3	0	0	0	0
283	5	3	1	1	1	1
283	6	3	0	0	1	1
283	11	3	1	1	1	1
283	17	3	0	1	1	1
284	5	3	1	1	1	1
284	6	3	1	1	1	1
284	11	3	1	1	1	1
284	17	3	0	1	1	1
285	5	3	1	1	1	1
285	6	3	1	1	1	1
285	11	3	1	1	1	1
285	17	3	1	1	1	1
286	5	3	0	0	0	0
286	6	3	0	0	0	0
286	11	3	0	1	0	0
286	17	3	0	0	0	0
287	5	3	1	1	1	1
287	6	3	0	0	1	1
287	11	3	1	1	1	1
287	17	3	0	1	1	1
288	5	3	0	0	0	0
288	6	3	0	0	0	0
288	11	3	0	1	0	0
288	17	3	0	0	0	0
289	5	3	1	1	0	0
289	6	3	1	1	0	0
289	11	3	0	0	0	0
289	17	3	0	0	0	0
290	5	3	1	1	0	0
290	6	3	0	0	0	0
290	11	3	0	0	0	0
290	17	3	0	0	0	0
291	5	3	1	1	0	0
291	6	3	0	0	0	0
291	11	3	0	0	0	0
291	17	3	0	0	0	0
292	5	3	1	1	1	1
292	6	3	1	1	1	1
292	11	3	1	1	1	1
292	17	3	0	1	1	1
293	5	3	0	1	0	1
293	6	3	0	1	0	1
293	11	3	0	1	0	1
293	17	3	0	1	0	1
294	5	3	1	1	0	1
294	6	3	0	0	0	1
294	11	3	0	1	0	1
294	17	3	0	1	0	1
295	5	3	0	0	0	0
295	6	3	0	0	0	0
295	11	3	0	1	0	0
295	17	3	0	0	0	0
296	5	3	0	0	0	0
296	6	3	0	0	0	0
296	11	3	0	0	0	0
296	17	3	0	0	0	0
297	5	3	1	1	0	0
297	6	3	1	1	0	0
297	11	3	1	1	0	0
297	17	3	0	1	0	0
298	5	3	1	1	0	0
298	6	3	0	0	0	0
298	11	3	0	1	0	0
298	17	3	0	1	0	0
299	5	3	0	0	0	0
299	6	3	0	0	0	0
299	11	3	0	0	0	0
299	17	3	0	0	0	0
300	5	3	1	1	0	1
300	6	3	1	1	0	1
300	11	3	1	1	0	1
300	17	3	1	1	0	1
